# Supplementary material for: Data-Driven Uncertainty Quantification for Cardiac Electrophysiological Models: Impact of Physiological Variability on Action Potential and Spiral Wave Dynamics
Source: PubMed Central journal article supplement (PMC7711195; doi:10.3389/fphys.2020.585400), 2020-11-19
Supplement: Data_Sheet_1.pdf [file Data_Sheet_1.pdf]

## **Supplementary Material:**

# **Data-driven uncertainty quantification for cardiac electrophysiological models: impact of physiological variability on action potential and spiral wave dynamics**

## **1 RESULTS FROM STAGE 1 OF THE TWO-STAGE APPROACH**

Figure S1 presents results of fitting

$$F(g_{to}, E_r, k_r) = g_{to} \left( 1 + \exp \left( \frac{-(V - E_r)}{k_r} \right) \right)^{-1} (V - E_K)$$

to voltage clamp recordings from  $n = 16$  canine epicardial cells.  $E_K$  was set to  $-85$  mV.

Figure S2 presents results of fitting

$$F(E_s, k_s, \alpha) = \left( \frac{1}{1 + \exp((V - E_s)/k_s)} + \alpha \right) (1 + \alpha)^{-1};$$

to voltage clamp recordings from  $n = 14$  canine epicardial cells.

## **2 BIMODAL APD HISTOGRAM UNDER UNCERTAIN $I_{KS}$ PARAMETERS**

Figure S3 plots the relationship between  $E_{xs}$  and APD for the uncertain  $I_{KS}$  parameters experiment (see main body, Figure 2(F)). The figure shows that the value of  $E_{xs}$  is a dominant factor in determining APD, as compared to the other  $I_{KS}$  parameters (compare red diamonds with blue stars), and that at larger values of  $E_{xs}$  the relationship between  $E_{xs}$  and APD is flat.

## **3 IMPACT OF PARAMETER CORRELATION ON $I_{CaL}$ WINDOW CURRENT**

Figure S4 plots the impact of introducing correlation between  $I_{CaL}$  parameters  $E_d$  and  $E_f$ , on the magnitude and location of the  $I_{CaL}$  window current, to complement Figure 3 in the main body. Given a set of  $I_{CaL}$  parameters  $(g_{CaL}, E_d, k_d, E_f, k_f)$ , window current magnitude was defined as the maximum absolute value of  $g_{CaL} d_{\infty}(V; E_d, k_d) f_{\infty}(V; E_f, k_f) (V - E_{Ca})$ ; location (center) was defined as the voltage at which the maximum was attained. The figure plots the distribution of the magnitude and location under uncertain parameters, for different levels of correlation between  $E_d$  and  $E_f$ .

## **4 IMPACT OF $I_{TO}$ PARAMETER CORRELATION**

Figure S5 plots the results of removing  $I_{TO}$  parameter correlation on action potentials and APD distribution, that is, repeating the simulations behind Figure 2(C) with a diagonal covariance matrix for  $I_{TO}$  parameters.

## 5 SNAPSHOTS OF ACTIVITY IN SPIRAL WAVE SIMULATIONS UNDER PARAMETER VARIABILITY

For the spiral wave uncertainty analysis, Figures S6-S8 presents 100 snapshots of the activity at  $t = 1000\text{ms}$ , for 100 randomly chosen parameters, under  $I_{K1}$ ,  $I_{Kr}$  and  $I_{Ks}$  uncertainty, respectively. Corresponding figures for  $I_{to}$  and  $I_{CaL}$  are in the main body. Figures S9-S13 are the corresponding figures for  $t = 2000\text{ms}$ , for all five currents.

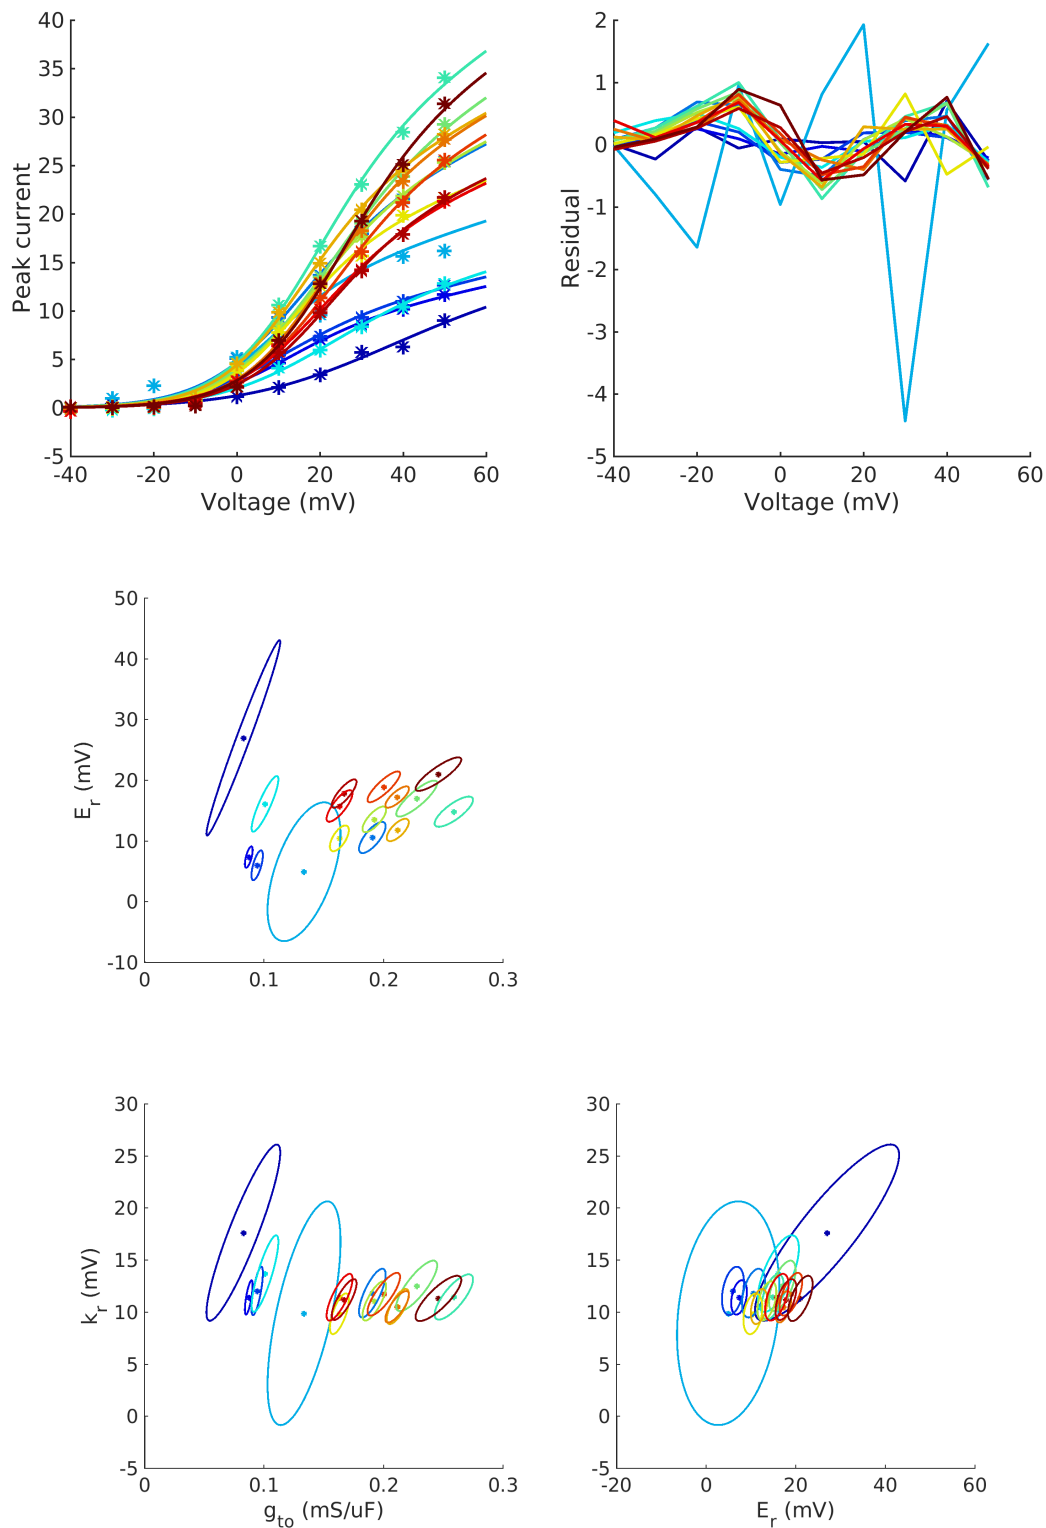

**Figure S1.** Individualized fits of  $I_{T0}$  activation parameters. Top-left: experiment voltage clamp data (stars) and fitted model (line) for  $n = 16$  cells. Top-right: corresponding residuals. Bottom-half: cell-specific parameters (solid diamonds) and cell-specific 90% confidence regions (ellipses) for the three fitted parameters,  $g_{t0}$ ,  $E_r$ ,  $k_r$ , for each of the cells.

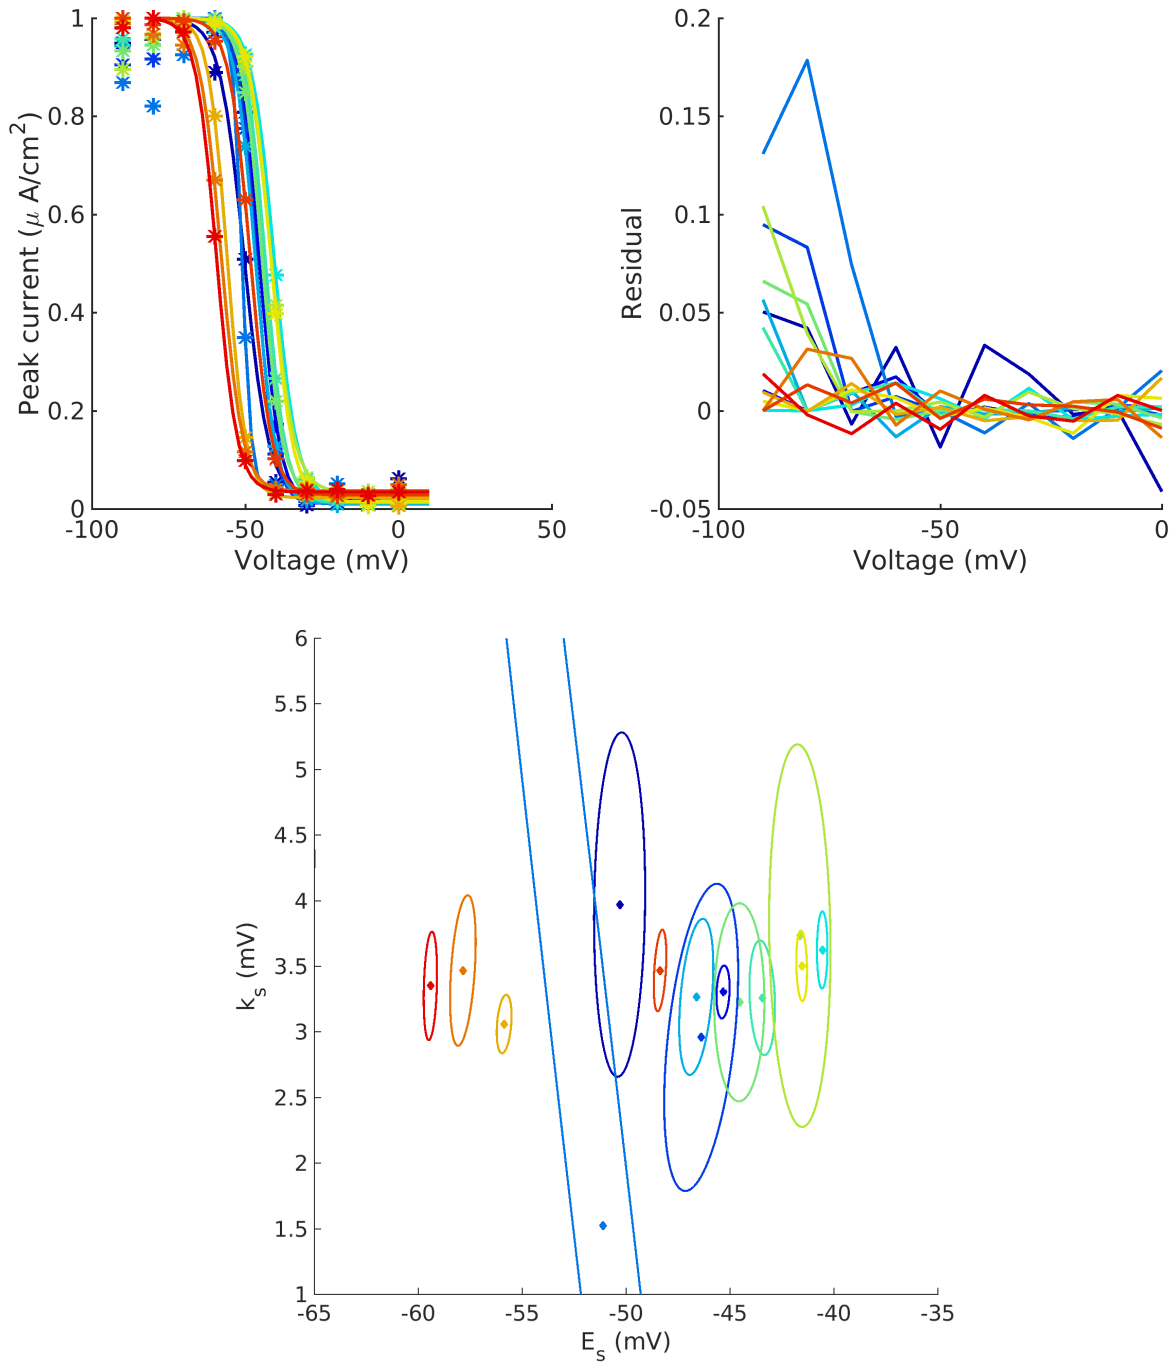

**Figure S2.** Individualized fits of  $I_{T0}$  inactivation parameters. Top-left: experiment voltage clamp data (stars) and fitted model (line) for  $n = 14$  cells. Top-right: corresponding residuals. Bottom: cell-specific parameters (solid diamonds) and cell-specific 90% confidence regions (ellipses) for two ( $E_s$ ,  $k_s$ ) of the three fitted parameters (offset  $\alpha$  was fit and then discarded).

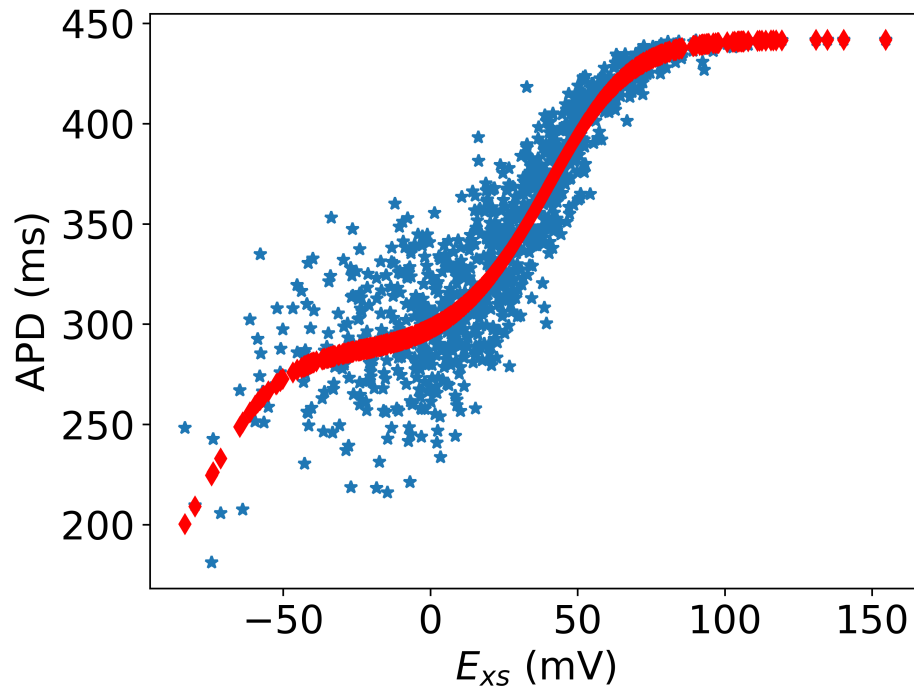

**Figure S3.** Relationship between  $E_{xs}$  and APD. Blue stars represent simulations where other  $I_{Ks}$  parameters were uncertain. Red diamonds represent simulations where other  $I_{Ks}$  parameters are fixed at mean values.

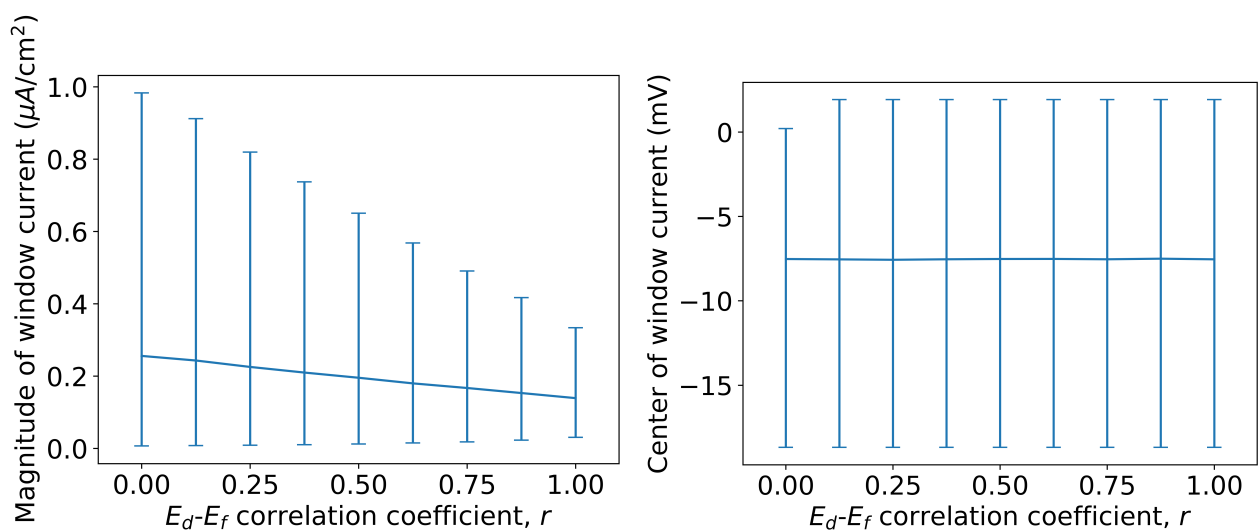

**Figure S4.** Effect of introducing correlation between half-activation voltage  $E_d$  and half-inactivation voltage  $E_f$  on  $I_{CaL}$  window current. Left: mean value of window current magnitude with 5th and 95th percentiles. Right: mean value of window current location with 5th and 95th percentiles.

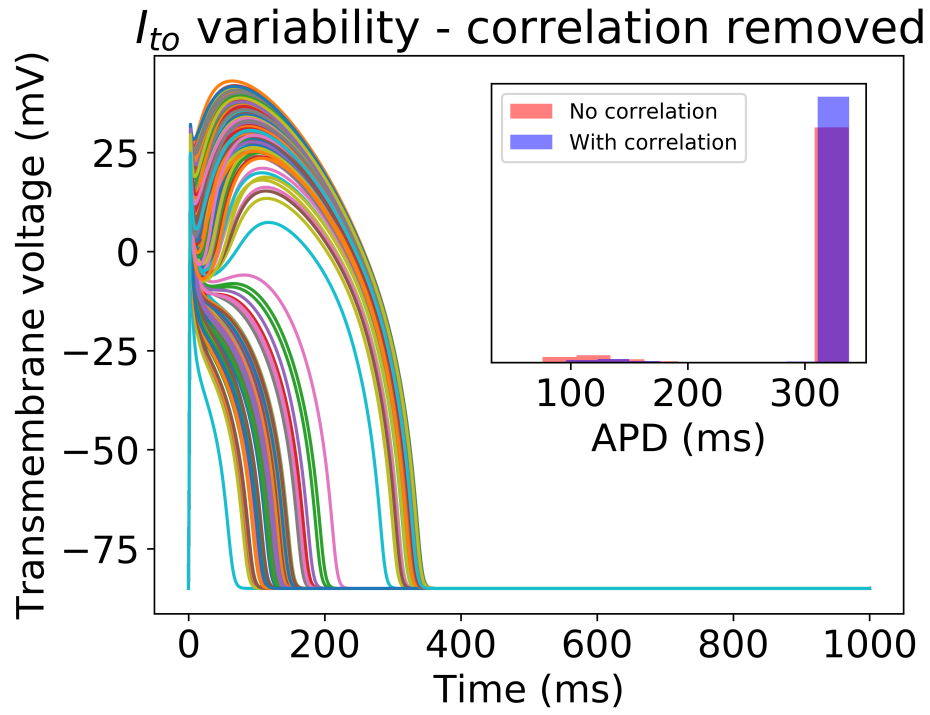

**Figure S5.** Effect of neglecting inferred correlations in  $I_{t_0}$  parameters. 1000 sample action potentials with histograms of APD ( $N = 100,000$ ) in inset.

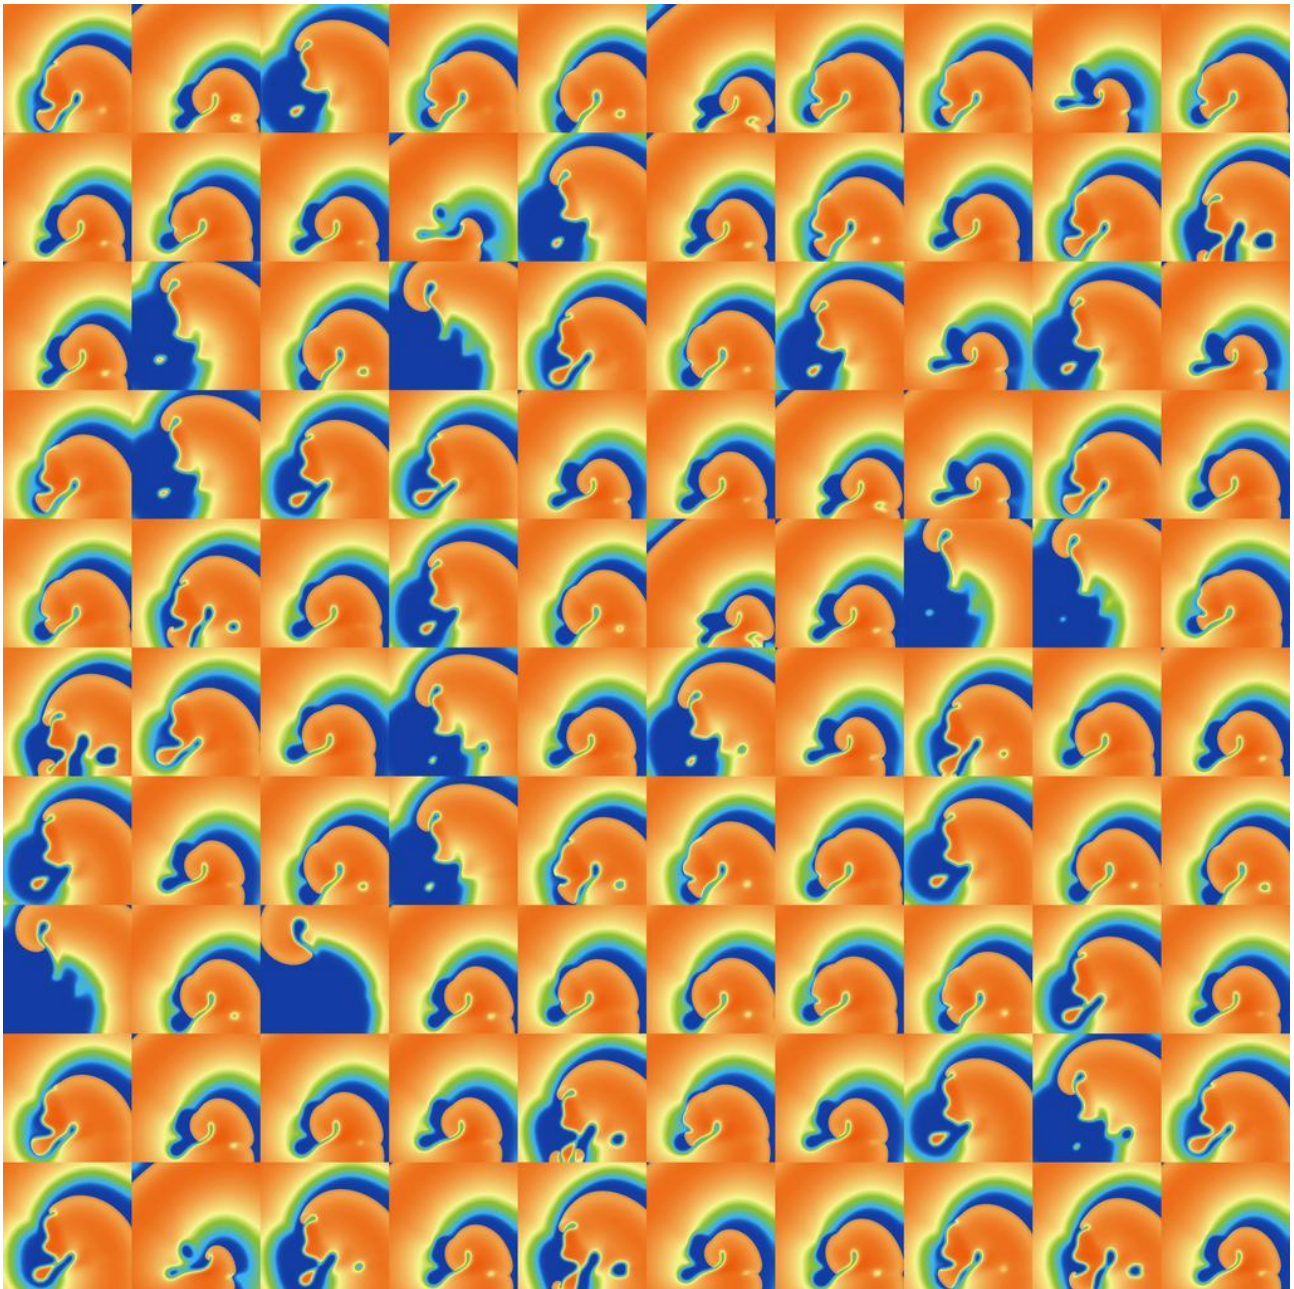

**Figure S6.** Snapshots of activity at  $t = 1000\text{ms}$  for 100 random parameters, under  $I_{K1}$  parameter uncertainty.



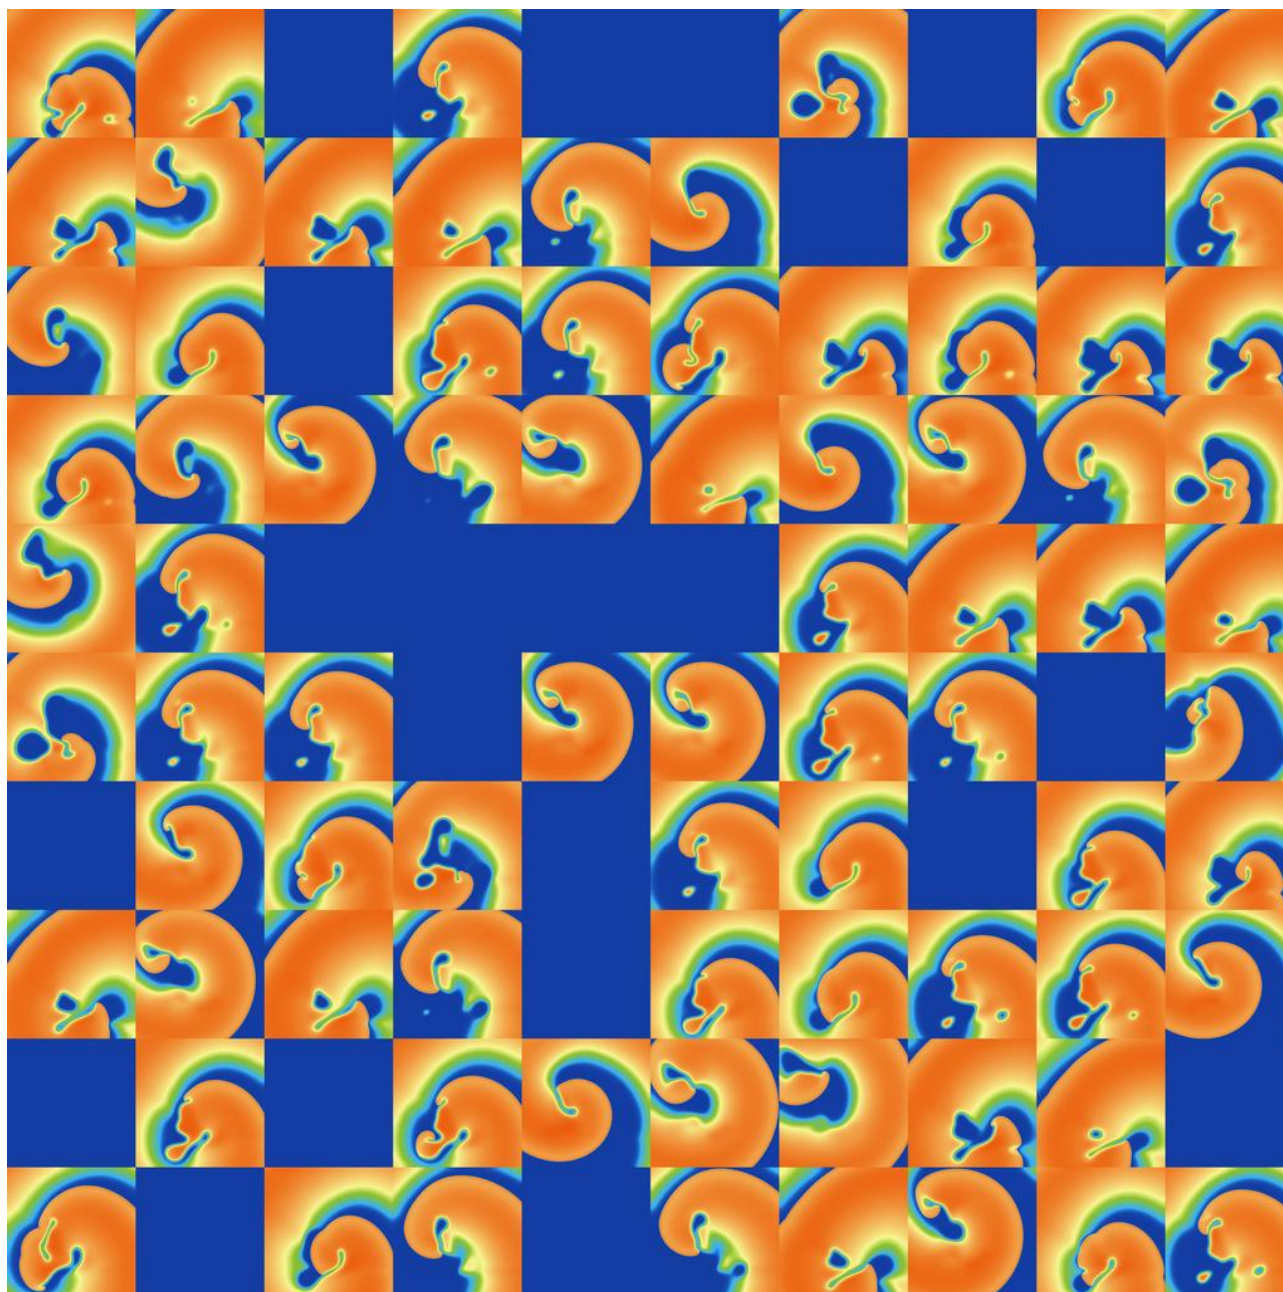

**Figure S7.** Snapshots of activity at  $t = 1000\text{ms}$  for 100 random parameters, under  $I_{KR}$  parameter uncertainty.



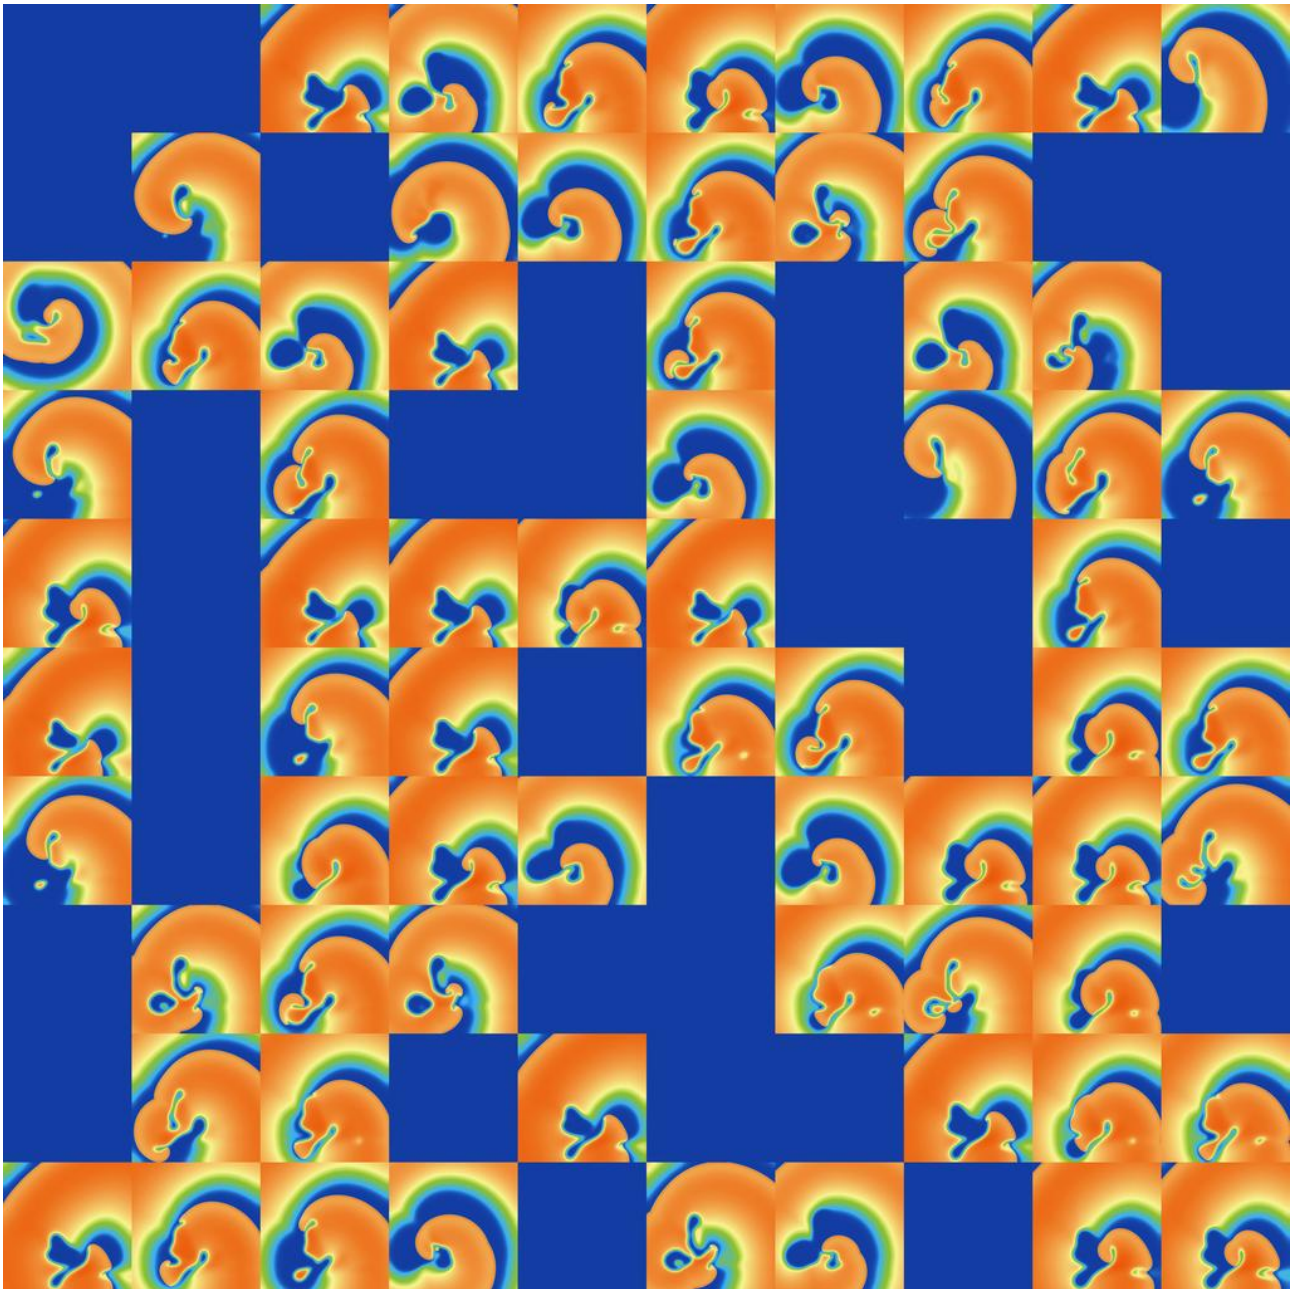

**Figure S8.** Snapshots of activity at  $t = 1000\text{ms}$  for 100 random parameters, under  $I_{K_S}$  parameter uncertainty.

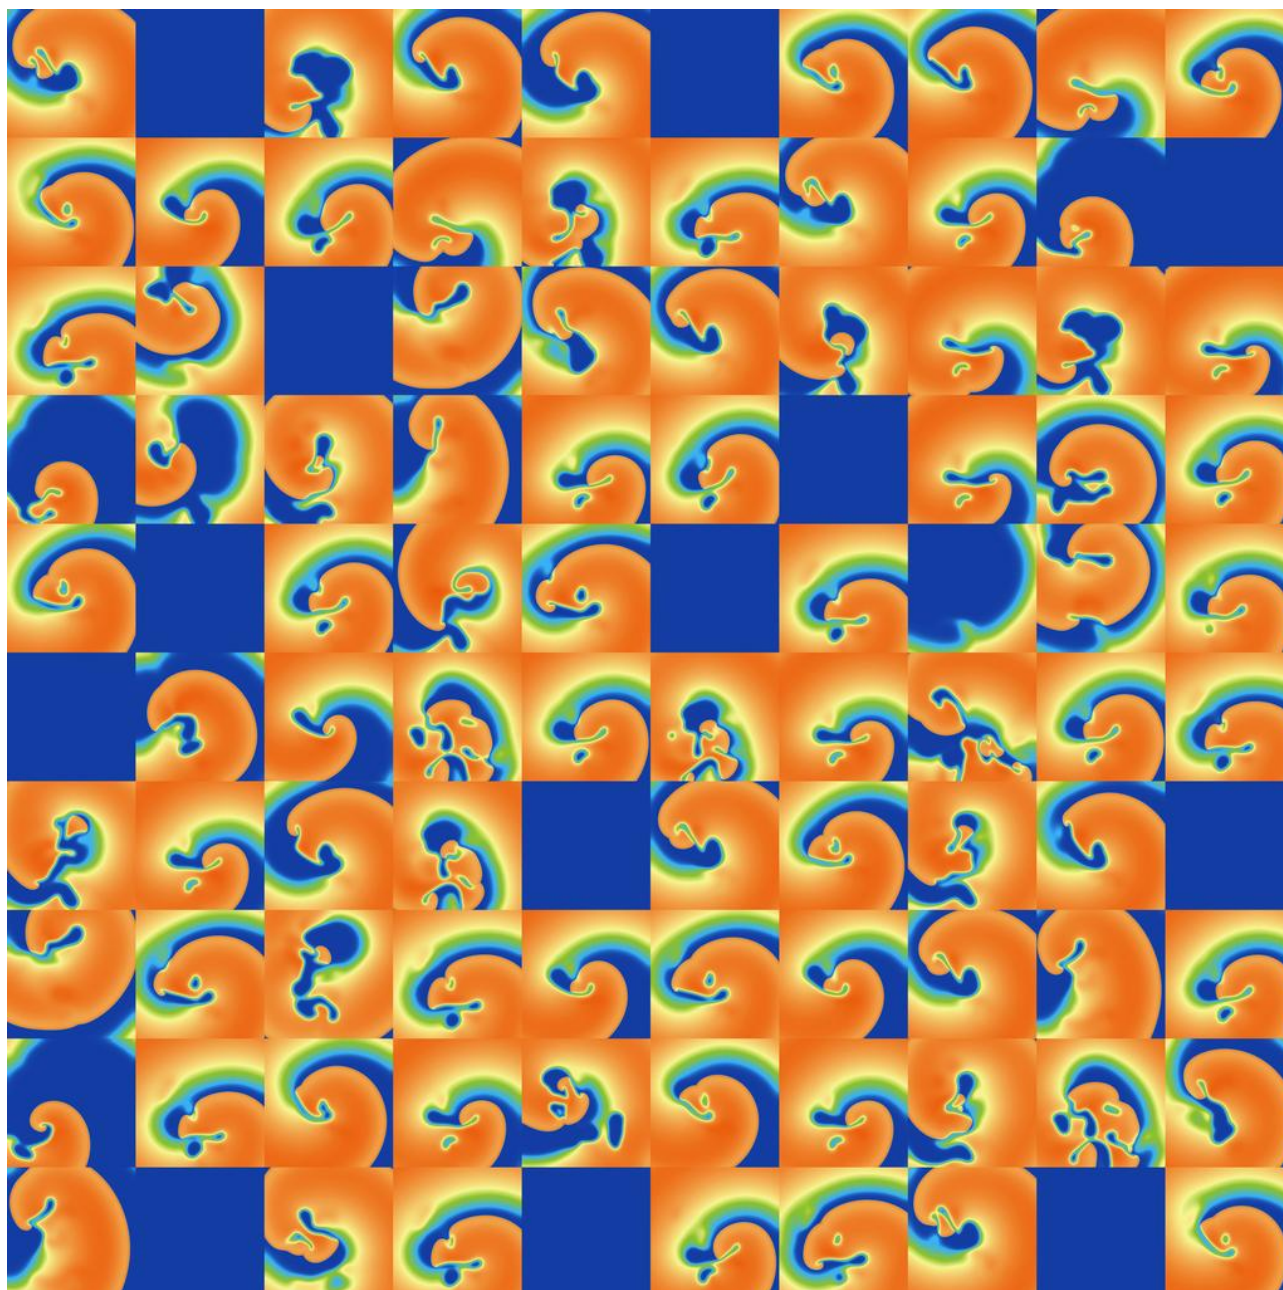

**Figure S9.** Snapshots of activity at  $t = 2000\text{ms}$  for 100 random parameters, under  $I_{K1}$  parameter uncertainty.



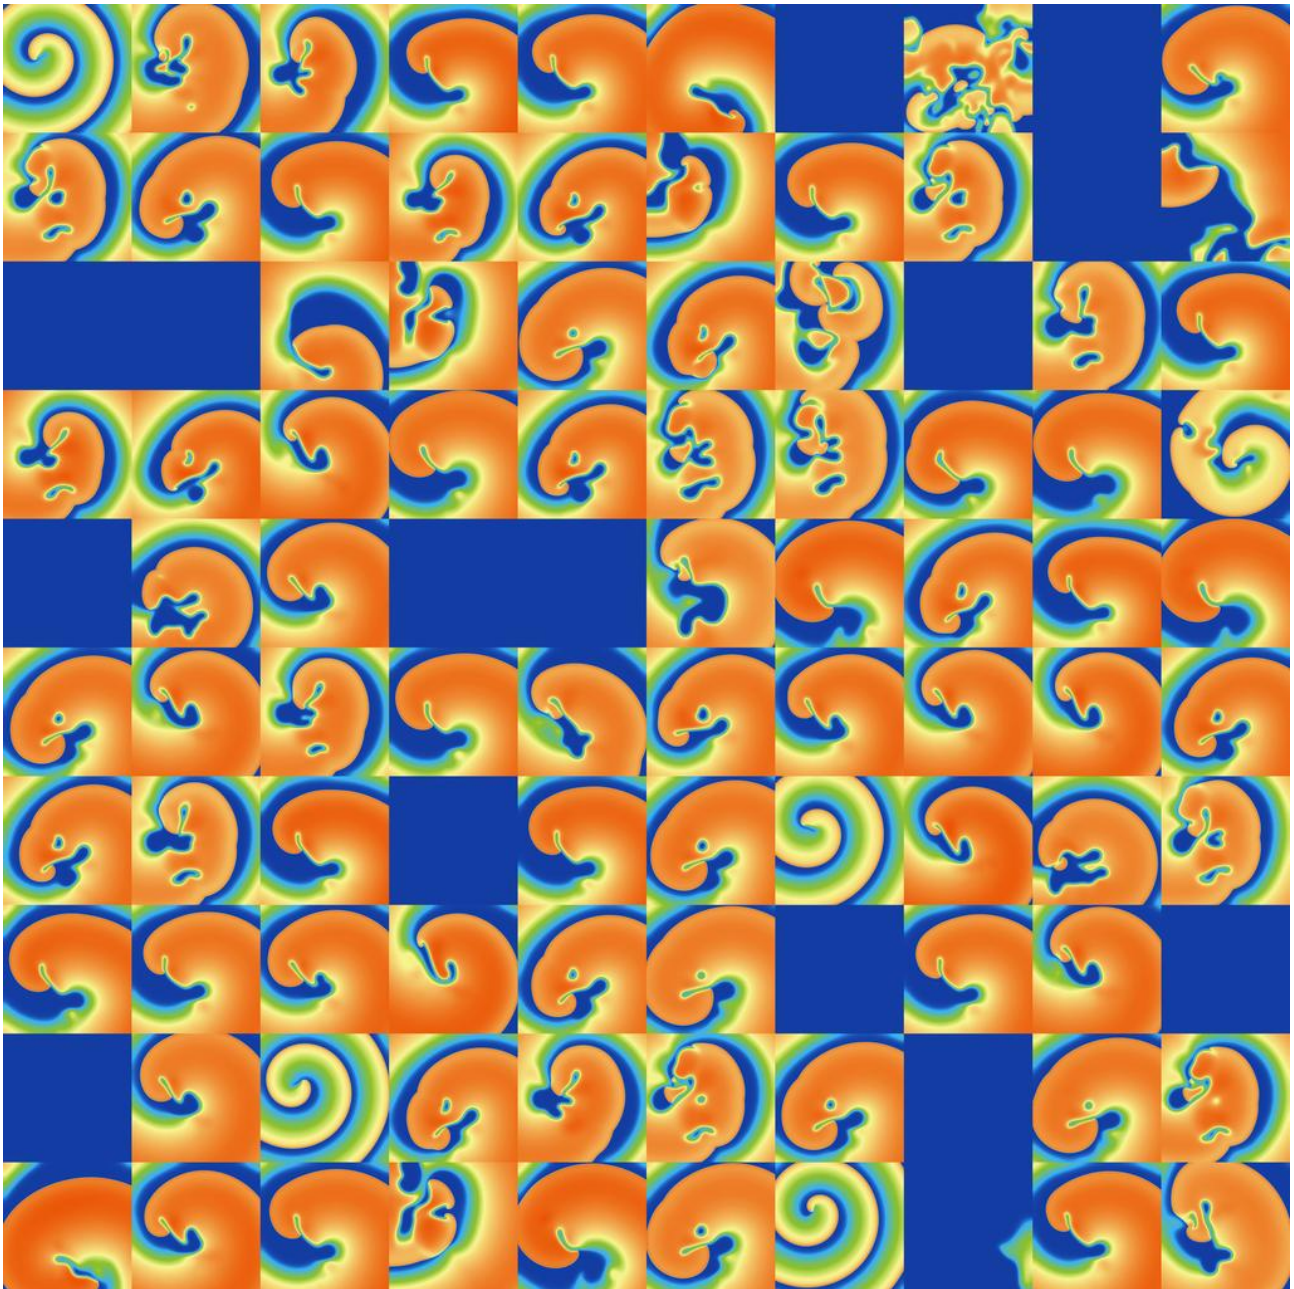

**Figure S10.** Snapshots of activity at  $t = 2000\text{ms}$  for 100 random parameters, under  $I_{to}$  parameter uncertainty.

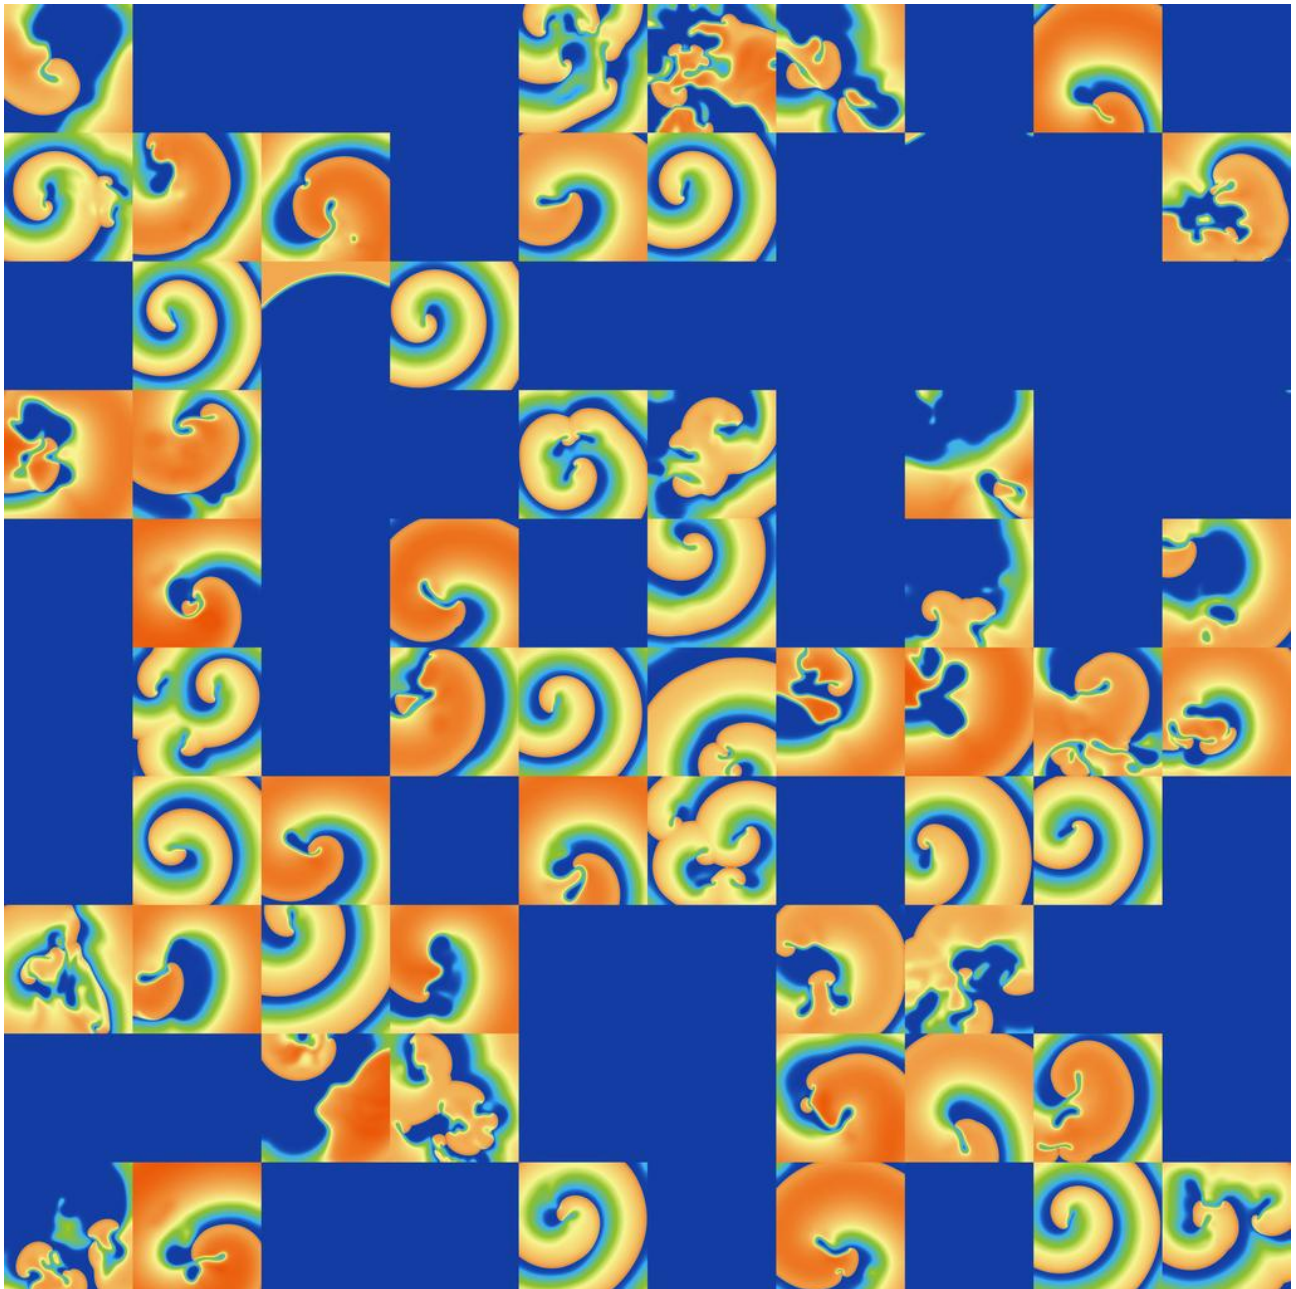

**Figure S11.** Snapshots of activity at  $t = 2000$ ms for 100 random parameters, under  $I_{CaL}$  parameter uncertainty.



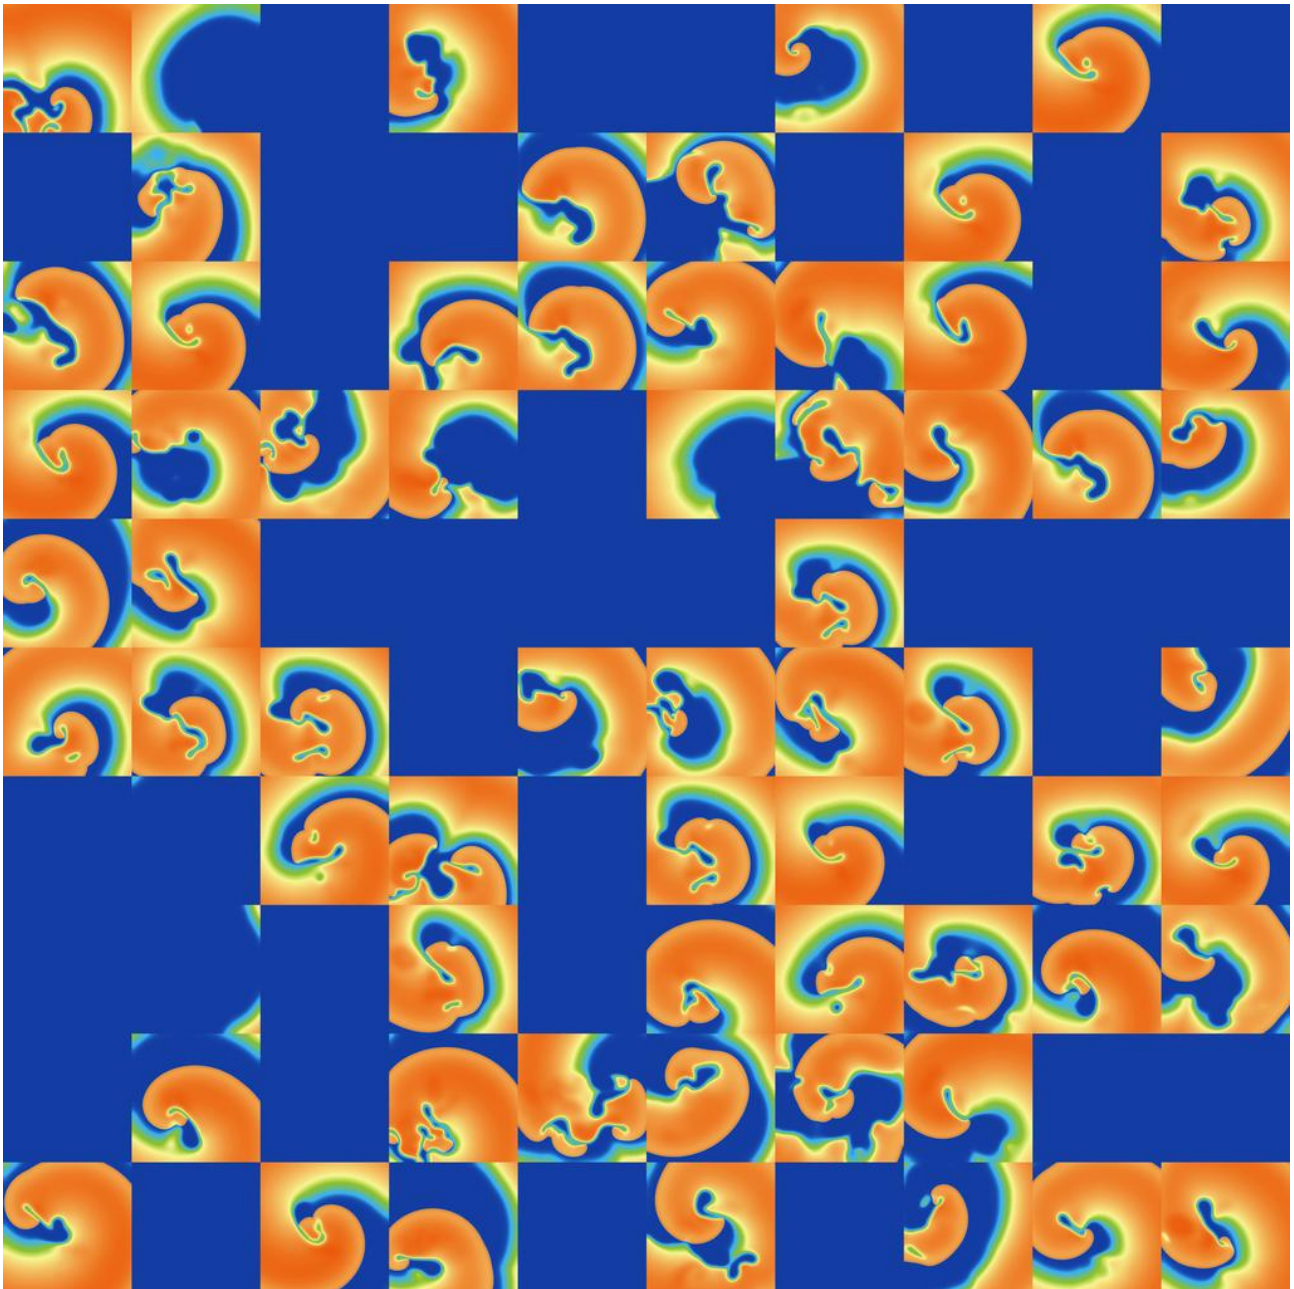

**Figure S12.** Snapshots of activity at  $t = 2000\text{ms}$  for 100 random parameters, under  $I_{K_r}$  parameter uncertainty.



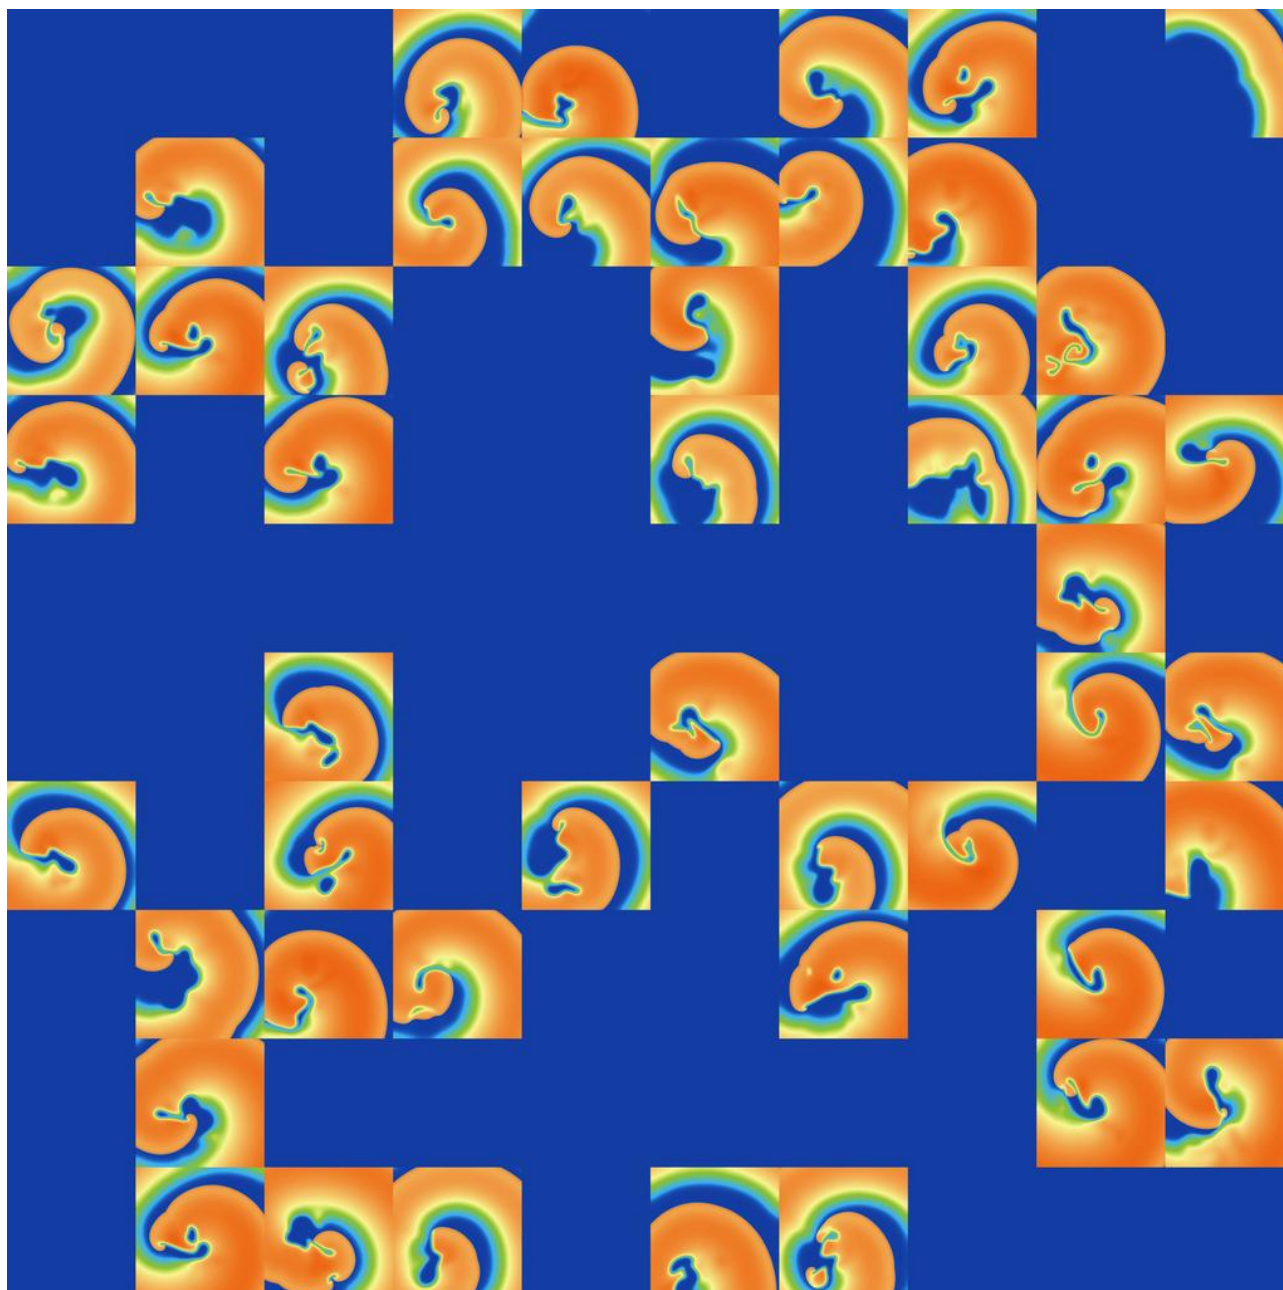

**Figure S13.** Snapshots of activity at  $t = 2000\text{ms}$  for 100 random parameters, under  $I_{K_S}$  parameter uncertainty.
